# Supplementary material for: DLm6Am: A Deep-Learning-Based Tool for Identifying N6,2′-O-Dimethyladenosine Sites in RNA Sequences
Source: MDPI journal article supplement (doi:10.3390/ijms231911026), 2022-09-20
Supplement: s1 [file s1]

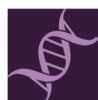

## Supplementary Materials

# DLM6Am: A Deep-Learning-Based Tool for Identifying N6,2'-O-Dimethyladenosine Sites in RNA Sequences

Zhengtao Luo <sup>1,†</sup>, Wei Su <sup>2,†</sup>, Liliang Lou <sup>1</sup>, Wangren Qiu <sup>1</sup>, Xuan Xiao <sup>1,\*</sup> and Zhaochun Xu <sup>1,\*</sup>

<sup>1</sup> Computer Department, Jingdezhen Ceramic University, Jingdezhen 333403, China

<sup>2</sup> School of Life Science and Technology and Center for Informational Biology, University of Electronic Science and Technology of China, Chengdu 610054, China

\* Correspondence: xiaoxuan@jcu.edu.cn (X.X.); xuzhaochun@jcu.edu.cn (Z.X.)

† These authors contributed equally to this work.

## Supplementary Note S1

Here, we plotted learning curves to infer the training set size that can make the model reach a stable state based on the cross-validation scores. In this plot, the abscissa axis represents the training set size, and the vertical axis represents the cross-validation scores. Specifically, we randomly sampled 500 positive samples and 500 negative samples as training set from the benchmark dataset, and the remaining samples as testing set. And then, the five-fold cross-validation was implemented 5 times on the current training set to obtain the average metric values, such as ACC and AUROC. Next, we randomly moved 100 positive samples and 100 negative samples from the testing set to training set, and implemented five-fold cross-validation 5 times again on training set, this process is repeated until the ratio of the training set and testing set is 9:1.

It can be seen from **Figure S1**, with the increase of the training set size, the ACC values show an increase trend under the overall. When the sample size was 2800, ACC reaches the maximum. Moreover, the AUROC values increase as the training set size increases, but run to steady when the training set size reaches 2800, i.e. the ratio of the number of training and testing set is close to 8:2, indicating that the ratio of 8:2 used for training/testing in this manuscript is reasonable. This ratio is widely used in construction of training/testing set for modification site identification, such as multi-type post-translational modification sites in rice (PMID: 34864888), RNA D sites (PMID: 31077296), and so on.

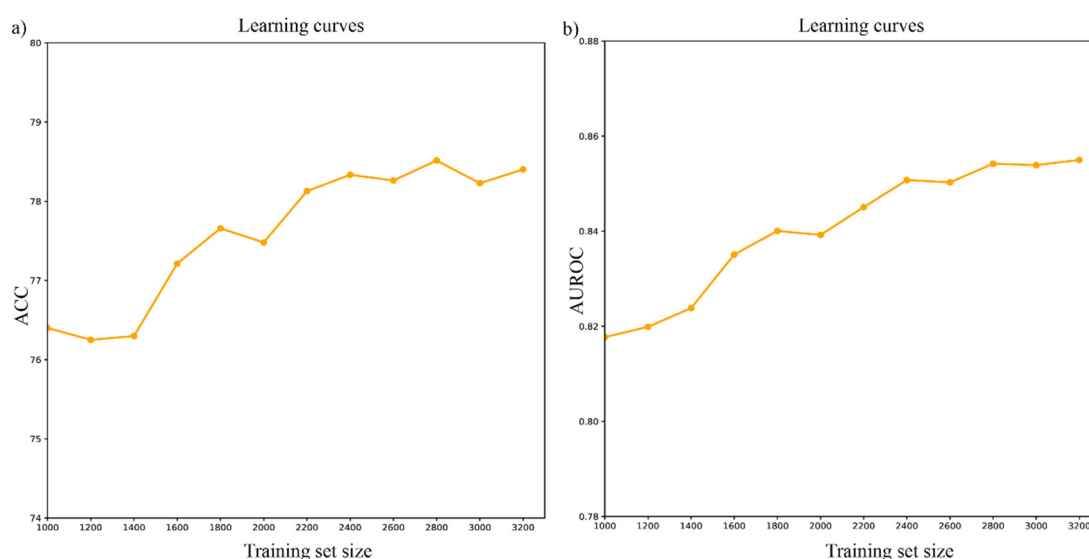

**Figure S1.** The learning curves plotted by the training set size and cross-validation scores.

## Supplementary Note S2

**Supplementary Note S2** provides more details regarding actual model configurations used, such as layer sizes, depth, number of parameters, etc.

### 1.RF

RandomForestClassifier:(n\_estimators=500)

### 2.SVM

SVC:(C=1.2, probability=True)

### 3.XGBoost

GradientBoostingClassifier:(n\_estimators=250)

### 4.CNN

Model: "sequential"

| Layer (type)                 | Output Shape   | Param # |
|------------------------------|----------------|---------|
| conv1d (Conv1D)              | (None, 38, 32) | 1056    |
| conv1d_1 (Conv1D)            | (None, 35, 32) | 4128    |
| max_pooling1d (MaxPooling1D) | (None, 17, 32) | 0       |
| dropout (Dropout)            | (None, 17, 32) | 0       |
| flatten (Flatten)            | (None, 544)    | 0       |
| dense (Dense)                | (None, 10)     | 5450    |
| dense_1 (Dense)              | (None, 2)      | 22      |

Total params: 10,656

Trainable params: 10,656

Non-trainable params: 0

### 5.BiLSTM

Model: "sequential"

| Layer (type)                           | Output Shape | Param # |
|----------------------------------------|--------------|---------|
| bidirectional (Bidirectional multiple) |              | 10496   |
| bidirectional_1 (Bidirection multiple) |              | 10368   |
| flatten (Flatten)                      | multiple     | 0       |
| dropout (Dropout)                      | multiple     | 0       |

|                 |          |       |
|-----------------|----------|-------|
| dense (Dense)   | multiple | 13130 |
| dense_1 (Dense) | multiple | 22    |

Total params: 34,016

Trainable params: 34,016

Non-trainable params: 0

## 6.CNN-BiLSTM

```
net:((lstm): LSTM(8, 32, num_layers=2, batch_first=True, bidirectional=True)
(lstm_fc): Linear(in_features=2624, out_features=256, bias=True)
(block2): Sequential(
  (0): Conv2d(1, 32, kernel_size=(4, 4), stride=(1, 1))
  (1): Conv2d(32, 64, kernel_size=(4, 4), stride=(1, 1))
  (2): MaxPool2d(kernel_size=2, stride=2, padding=0, dilation=1, ceil_mode=False)
)
(block3): Sequential(
  (0): Dropout(p=0.5, inplace=False)
  (1): Linear(in_features=1344, out_features=128, bias=True)
  (2): LeakyReLU(negative_slope=0.01)
  (3): Linear(in_features=128, out_features=12, bias=True)
  (4): LeakyReLU(negative_slope=0.01)
  (5): Linear(in_features=12, out_features=2, bias=True)
  (6): Softmax(dim=1)
))
```

## 7.CNN-BiLSTM-attention

```
net:((encoder_layer): TransformerEncoderLayer(
  (self_attn): MultiheadAttention(
    (out_proj): NonDynamicallyQuantizableLinear(in_features=8, out_features=8, bias=True)
  )
  (linear1): Linear(in_features=8, out_features=2048, bias=True)
  (dropout): Dropout(p=0.1, inplace=False)
  (linear2): Linear(in_features=2048, out_features=8, bias=True)
  (norm1): LayerNorm((8,), eps=1e-05, elementwise_affine=True)
  (norm2): LayerNorm((8,), eps=1e-05, elementwise_affine=True)
  (dropout1): Dropout(p=0.1, inplace=False)
  (dropout2): Dropout(p=0.1, inplace=False)
)
(transformer_encoder): TransformerEncoder(
  (layers): ModuleList(
    (0): TransformerEncoderLayer(
      (self_attn): MultiheadAttention(
        (out_proj): NonDynamicallyQuantizableLinear(in_features=8, out_features=8, bias=True)
      )
      (linear1): Linear(in_features=8, out_features=2048, bias=True)
      (dropout): Dropout(p=0.1, inplace=False)
      (linear2): Linear(in_features=2048, out_features=8, bias=True)
      (norm1): LayerNorm((8,), eps=1e-05, elementwise_affine=True)
      (norm2): LayerNorm((8,), eps=1e-05, elementwise_affine=True)
      (dropout1): Dropout(p=0.1, inplace=False)
      (dropout2): Dropout(p=0.1, inplace=False)
    )
  )
)
```

```

)
)
)
(lstm): LSTM(8, 32, num_layers=2, batch_first=True, bidirectional=True)
(lstm_fc): Linear(in_features=2624, out_features=256, bias=True)
(block2): Sequential(
  (0): Conv2d(1, 32, kernel_size=(4, 4), stride=(1, 1))
  (1): Conv2d(32, 64, kernel_size=(4, 4), stride=(1, 1))
  (2): MaxPool2d(kernel_size=2, stride=2, padding=0, dilation=1, ceil_mode=False)
)
(block3): Sequential(
  (0): Dropout(p=0.5, inplace=False)
  (1): Linear(in_features=1344, out_features=128, bias=True)
  (2): LeakyReLU(negative_slope=0.01)
  (3): Linear(in_features=128, out_features=12, bias=True)
  (4): LeakyReLU(negative_slope=0.01)
  (5): Linear(in_features=12, out_features=2, bias=True)
  (6): Softmax(dim=1)
))

```

### 8.DLm6Am

```

net1:((encoder_layer): TransformerEncoderLayer(
  (self_attn): MultiheadAttention(
    (out_proj): NonDynamicallyQuantizableLinear(in_features=8, out_features=8, bias=True)
  )
  (linear1): Linear(in_features=8, out_features=2048, bias=True)
  (dropout): Dropout(p=0.1, inplace=False)
  (linear2): Linear(in_features=2048, out_features=8, bias=True)
  (norm1): LayerNorm((8,), eps=1e-05, elementwise_affine=True)
  (norm2): LayerNorm((8,), eps=1e-05, elementwise_affine=True)
  (dropout1): Dropout(p=0.1, inplace=False)
  (dropout2): Dropout(p=0.1, inplace=False)
)
(transformer_encoder): TransformerEncoder(
  (layers): ModuleList(
    (0): TransformerEncoderLayer(
      (self_attn): MultiheadAttention(
        (out_proj): NonDynamicallyQuantizableLinear(in_features=8, out_features=8, bias=True)
      )
      (linear1): Linear(in_features=8, out_features=2048, bias=True)
      (dropout): Dropout(p=0.1, inplace=False)
      (linear2): Linear(in_features=2048, out_features=8, bias=True)
      (norm1): LayerNorm((8,), eps=1e-05, elementwise_affine=True)
      (norm2): LayerNorm((8,), eps=1e-05, elementwise_affine=True)
      (dropout1): Dropout(p=0.1, inplace=False)
      (dropout2): Dropout(p=0.1, inplace=False)
    )
  )
)
)
(lstm): LSTM(8, 32, num_layers=2, batch_first=True, bidirectional=True)
(lstm_fc): Linear(in_features=2624, out_features=256, bias=True)
(block2): Sequential(
  (0): Conv2d(1, 32, kernel_size=(4, 4), stride=(1, 1))

```

```

(1): Conv2d(32, 64, kernel_size=(4, 4), stride=(1, 1))
(2): MaxPool2d(kernel_size=2, stride=2, padding=0, dilation=1, ceil_mode=False)
)
(block3): Sequential(
  (0): Dropout(p=0.5, inplace=False)
  (1): Linear(in_features=1344, out_features=128, bias=True)
  (2): LeakyReLU(negative_slope=0.01)
  (3): Linear(in_features=128, out_features=12, bias=True)
  (4): LeakyReLU(negative_slope=0.01)
  (5): Linear(in_features=12, out_features=2, bias=True)
  (6): Softmax(dim=1)
))

net2:((encoder_layer): TransformerEncoderLayer(
  (self_attn): MultiheadAttention(
    (out_proj): NonDynamicallyQuantizableLinear(in_features=8, out_features=8, bias=True)
  )
  (linear1): Linear(in_features=8, out_features=2048, bias=True)
  (dropout): Dropout(p=0.1, inplace=False)
  (linear2): Linear(in_features=2048, out_features=8, bias=True)
  (norm1): LayerNorm((8,), eps=1e-05, elementwise_affine=True)
  (norm2): LayerNorm((8,), eps=1e-05, elementwise_affine=True)
  (dropout1): Dropout(p=0.1, inplace=False)
  (dropout2): Dropout(p=0.1, inplace=False)
)
(transformer_encoder): TransformerEncoder(
  (layers): ModuleList(
    (0): TransformerEncoderLayer(
      (self_attn): MultiheadAttention(
        (out_proj): NonDynamicallyQuantizableLinear(in_features=8, out_features=8, bias=True)
      )
      (linear1): Linear(in_features=8, out_features=2048, bias=True)
      (dropout): Dropout(p=0.1, inplace=False)
      (linear2): Linear(in_features=2048, out_features=8, bias=True)
      (norm1): LayerNorm((8,), eps=1e-05, elementwise_affine=True)
      (norm2): LayerNorm((8,), eps=1e-05, elementwise_affine=True)
      (dropout1): Dropout(p=0.1, inplace=False)
      (dropout2): Dropout(p=0.1, inplace=False)
    )
  )
)
(lstm): LSTM(8, 32, num_layers=2, batch_first=True, bidirectional=True)
(lstm_fc): Linear(in_features=2624, out_features=256, bias=True)
(block2): Sequential(
  (0): Conv2d(1, 32, kernel_size=(4, 4), stride=(1, 1))
  (1): Conv2d(32, 64, kernel_size=(4, 4), stride=(1, 1))
  (2): MaxPool2d(kernel_size=2, stride=2, padding=0, dilation=1, ceil_mode=False)
)
(block3): Sequential(
  (0): Dropout(p=0.5, inplace=False)
  (1): Linear(in_features=1344, out_features=128, bias=True)
  (2): LeakyReLU(negative_slope=0.01)
  (3): Linear(in_features=128, out_features=12, bias=True)
  (4): LeakyReLU(negative_slope=0.01)

```

```

(5): Linear(in_features=12, out_features=2, bias=True)
(6): Softmax(dim=1)
))

net3:((encoder_layer): TransformerEncoderLayer(
(self_attn): MultiheadAttention(
(out_proj): NonDynamicallyQuantizableLinear(in_features=8, out_features=8, bias=True)
)
(linear1): Linear(in_features=8, out_features=2048, bias=True)
(dropout): Dropout(p=0.1, inplace=False)
(linear2): Linear(in_features=2048, out_features=8, bias=True)
(norm1): LayerNorm((8,), eps=1e-05, elementwise_affine=True)
(norm2): LayerNorm((8,), eps=1e-05, elementwise_affine=True)
(dropout1): Dropout(p=0.1, inplace=False)
(dropout2): Dropout(p=0.1, inplace=False)
)
(transformer_encoder): TransformerEncoder(
(layers): ModuleList(
(0): TransformerEncoderLayer(
(self_attn): MultiheadAttention(
(out_proj): NonDynamicallyQuantizableLinear(in_features=8, out_features=8, bias=True)
)
(linear1): Linear(in_features=8, out_features=2048, bias=True)
(dropout): Dropout(p=0.1, inplace=False)
(linear2): Linear(in_features=2048, out_features=8, bias=True)
(norm1): LayerNorm((8,), eps=1e-05, elementwise_affine=True)
(norm2): LayerNorm((8,), eps=1e-05, elementwise_affine=True)
(dropout1): Dropout(p=0.1, inplace=False)
(dropout2): Dropout(p=0.1, inplace=False)
)
)
)
(lstm): LSTM(8, 32, num_layers=2, batch_first=True, bidirectional=True)
(lstm_fc): Linear(in_features=2624, out_features=256, bias=True)
(block2): Sequential(
(0): Conv2d(1, 32, kernel_size=(4, 4), stride=(1, 1))
(1): Conv2d(32, 128, kernel_size=(4, 4), stride=(1, 1))
(2): MaxPool2d(kernel_size=2, stride=2, padding=0, dilation=1, ceil_mode=False)
)
(block3): Sequential(
(0): Dropout(p=0.5, inplace=False)
(1): Linear(in_features=2432, out_features=256, bias=True)
(2): LeakyReLU(negative_slope=0.01)
(3): Linear(in_features=256, out_features=24, bias=True)
(4): LeakyReLU(negative_slope=0.01)
(5): Linear(in_features=24, out_features=2, bias=True)
(6): Softmax(dim=1)
))

```

### Supplementary Note S3

The additional performance gains of the DLM6Am model may be achieved while varying model complexity (e.g., number of layers/nodes), as well varying/increasing training set size. As seen in **Supplementary Note S1**, we inferred the optimal ratio (0.789, close to 8:2) of the training/testing set through learning curves. Therefore, here, we only analyzed the effect of varying model complexity (e.g. the number of layers and nodes for BiLSTM as well the number of layers and filters for CNN) on performance under this ratio of the training/testing set. The corresponding results were listed in **Table S1**. It can be seen that DLM6Am could achieve better prediction performance under the model configurations used in the manuscript, i.e. the number of layers for BiLSTM was set as 2, the number of nodes for BiLSTM as 32, the number of layers for CNN as 2 and the number of filters for CNN as 32.

**Table S1.** Model performance when varying model complexity.

| BiLSTM        |              | CNN           |                | Metrics      |              |              |               |               |               |
|---------------|--------------|---------------|----------------|--------------|--------------|--------------|---------------|---------------|---------------|
| No. of layers | No. of nodes | No. of layers | No. of filters | Acc(%)       | Sn(%)        | Sp(%)        | MCC           | AUC           | PR            |
| 2             | 16           | 2             | 16             | 78.44        | 79.49        | 77.38        | 0.5688        | 0.8493        | 0.8523        |
| 2             | 16           | 2             | 32             | 78.61        | 78.01        | 79.21        | 0.5723        | 0.8525        | 0.8524        |
| 2             | 16           | 2             | 64             | 78.37        | 78.79        | 77.94        | 0.5673        | 0.85          | 0.8503        |
| 2             | 32           | 2             | 16             | 78.68        | 79.28        | 78.08        | 0.5737        | 0.8504        | 0.8511        |
| <b>2</b>      | <b>32</b>    | <b>2</b>      | <b>32</b>      | <b>79.07</b> | <b>79.21</b> | <b>78.93</b> | <b>0.5814</b> | <b>0.8545</b> | <b>0.8532</b> |
| 2             | 32           | 2             | 64             | 78.79        | 79.7         | 77.87        | 0.5759        | 0.852         | 0.8535        |
| 2             | 64           | 2             | 16             | 78.05        | 79.63        | 76.46        | 0.5612        | 0.8446        | 0.8449        |
| 2             | 64           | 2             | 32             | 78.37        | 77.73        | 79           | 0.5673        | 0.8495        | 0.8507        |
| 2             | 64           | 2             | 64             | 78.54        | 79.07        | 78.01        | 0.5709        | 0.851         | 0.8519        |
| 2             | 16           | 3             | 16             | 78.22        | 77.66        | 78.79        | 0.5645        | 0.8495        | 0.8517        |
| 2             | 16           | 3             | 32             | 78.68        | 78.01        | 79.35        | 0.5737        | 0.8531        | 0.8544        |
| 2             | 16           | 3             | 64             | 78.05        | 76.96        | 79.14        | 0.5611        | 0.8437        | 0.8442        |
| 2             | 32           | 3             | 16             | 77.94        | 79.77        | 76.11        | 0.5592        | 0.8471        | 0.8446        |
| 2             | 32           | 3             | 32             | 78.4         | 78.79        | 78.01        | 0.568         | 0.8468        | 0.8454        |
| 2             | 32           | 3             | 64             | 78.19        | 78.01        | 78.37        | 0.5638        | 0.8465        | 0.8485        |
| 2             | 64           | 3             | 16             | 77.52        | 77.31        | 77.73        | 0.5504        | 0.8424        | 0.8383        |
| 2             | 64           | 3             | 32             | 78.4         | 78.15        | 78.65        | 0.568         | 0.8484        | 0.847         |
| 2             | 64           | 3             | 64             | 78.26        | 78.93        | 77.59        | 0.5652        | 0.8481        | 0.847         |
| 3             | 16           | 2             | 16             | 78.19        | 75.97        | 80.41        | 0.5643        | 0.8495        | 0.8496        |
| 3             | 16           | 2             | 32             | 78.72        | 79.07        | 78.37        | 0.5744        | 0.8512        | 0.8548        |
| 3             | 16           | 2             | 64             | 77.98        | 76.96        | 79           | 0.5597        | 0.8484        | 0.8505        |
| 3             | 32           | 2             | 16             | 78.47        | 78.79        | 78.15        | 0.5694        | 0.8483        | 0.8512        |
| 3             | 32           | 2             | 32             | 78.37        | 78.93        | 77.8         | 0.5673        | 0.8485        | 0.8495        |
| 3             | 32           | 2             | 64             | 78.26        | 78.58        | 77.94        | 0.5652        | 0.8493        | 0.852         |
| 3             | 64           | 2             | 16             | 78.33        | 79           | 77.66        | 0.5666        | 0.8463        | 0.8453        |
| 3             | 64           | 2             | 32             | 78.75        | 79.56        | 77.94        | 0.5751        | 0.8522        | 0.8516        |
| 3             | 64           | 2             | 64             | 78.15        | 78.79        | 77.52        | 0.5631        | 0.8496        | 0.8496        |
| 3             | 16           | 3             | 16             | 78.29        | 79           | 77.59        | 0.5659        | 0.8525        | 0.8525        |
| 3             | 16           | 3             | 32             | 77.87        | 80.2         | 75.55        | 0.558         | 0.8474        | 0.849         |
| 3             | 16           | 3             | 64             | 78.12        | 78.86        | 77.38        | 0.5624        | 0.8452        | 0.8451        |
| 3             | 32           | 3             | 16             | 78.26        | 80.27        | 76.25        | 0.5656        | 0.8521        | 0.8525        |
| 3             | 32           | 3             | 32             | 78.51        | 78.29        | 78.72        | 0.5701        | 0.8492        | 0.8499        |
| 3             | 32           | 3             | 64             | 78.15        | 79.14        | 77.17        | 0.5632        | 0.8501        | 0.8526        |
| 3             | 64           | 3             | 16             | 77.87        | 78.22        | 77.52        | 0.5574        | 0.8447        | 0.8436        |
| 3             | 64           | 3             | 32             | 78.4         | 77.8         | 79           | 0.568         | 0.8465        | 0.8457        |
| 3             | 64           | 3             | 64             | 78.15        | 78.37        | 77.94        | 0.5631        | 0.8462        | 0.8425        |

### Supplementary Note S4

We compared the prediction performance of between DLm6Am and other combinations of different base classifiers such as SVM, RF, XGBoost, LSTM, and CNN. The ensemble classification results are listed in the **Table S2**. It can be seen that the DLm6Am achieved better prediction performance than other ensemble combinations.

**Table S2.** Model performance when varying model complexity.

| Model                     | Acc(%)       | Sn(%)        | Sp(%)        | MCC           | AUROC         | AUPR          |
|---------------------------|--------------|--------------|--------------|---------------|---------------|---------------|
| RF-SVM-XGBoost            | 75.86        | 76.46        | 75.26        | 0.5173        | 0.8314        | 0.8287        |
| RF-SVM-BiLSTM             | 75.09        | 75.76        | 74.42        | 0.5018        | 0.8319        | 0.8266        |
| RF-SVM-CNN                | 76.43        | 77.17        | 75.69        | 0.5286        | 0.8508        | 0.8505        |
| RF-SVM-CNN+BiLSTM         | 75.58        | 75.83        | 75.33        | 0.5116        | 0.8496        | 0.8473        |
| RF-XGBoost-BiLSTM         | 76.39        | 76.74        | 76.04        | 0.5278        | 0.8331        | 0.8303        |
| RF-XGBoost-CNN            | 76.64        | 75.19        | 78.08        | 0.533         | 0.8441        | 0.8469        |
| RF-XGBoost-CNN+BiLSTM     | 76.32        | 74.77        | 77.87        | 0.5267        | 0.8443        | 0.8446        |
| RF-BiLSTM-CNN             | 77.17        | 77.45        | 76.89        | 0.5433        | 0.8456        | 0.8449        |
| RF-BiLSTM-CNN+BiLSTM      | 76.29        | 76.67        | 75.9         | 0.5257        | 0.8447        | 0.8419        |
| RF-CNN-CNN+BiLSTM         | 76.29        | 75.41        | 77.17        | 0.5258        | 0.8534        | 0.8455        |
| SVM-XGBoost-BiLSTM        | 75.58        | 76.46        | 74.7         | 0.5117        | 0.8335        | 0.8287        |
| SVM-XGBoost-CNN           | 76.85        | 78.37        | 75.33        | 0.5372        | 0.8448        | 0.8472        |
| SVM-XGBoost-CNN+BiLSTM    | 76.57        | 77.45        | 75.69        | 0.5314        | 0.8448        | 0.845         |
| SVM-BiLSTM-CNN            | 76.36        | 76.81        | 75.9         | 0.5272        | 0.847         | 0.8455        |
| SVM-BiLSTM-CNN+BiLSTM     | 76.43        | 76.89        | 75.97        | 0.5286        | 0.8446        | 0.8413        |
| SVM-CNN-CNN+BiLSTM        | 76.5         | 76.96        | 76.04        | 0.53          | 0.8513        | 0.8504        |
| XGBoost-BiLSTM-CNN        | 76.6         | 77.66        | 75.55        | 0.5322        | 0.8445        | 0.8449        |
| XGBoost-BiLSTM-CNN+BiLSTM | 76.07        | 76.6         | 75.55        | 0.5215        | 0.8451        | 0.8428        |
| XGBoost-CNN-CNN+BiLSTM    | 77.1         | 77.31        | 76.89        | 0.5419        | 0.8522        | 0.8466        |
| BiLSTM-CNN-CNN+BiLSTM     | 76.74        | 79.07        | 74.42        | 0.5355        | 0.8502        | 0.8486        |
| <b>DLm6Am</b>             | <b>79.07</b> | <b>79.21</b> | <b>78.93</b> | <b>0.5814</b> | <b>0.8545</b> | <b>0.8532</b> |
